# Supplementary material for: Is high-intensity interval cycling feasible and more beneficial than continuous cycling for knee osteoarthritic patients? Results of a randomised control feasibility trial
Source: PeerJ. 2018 May 9;6:e4738. doi: 10.7717/peerj.4738 (PMC5949056; doi:10.7717/peerj.4738)
Supplement: Supplemental Information 1 [file peerj-06-4738-s001.xlsx]

## Sheet: summary
		HIIT	n=8			CONT	n=8
		Before	After			before	After
WOMAC	ave	36.1111	21.1667			34.75	22.875
	std	14.9703	14.6245			15.5357	14.3894
	t-test	0.00534714				0.0065486
LeQuesne	ave	8.83333	6.72222			9.625	8.375
	std	4.272	3.88998			3.91654	4.59619
	t-test	0.101677				0.0805651
TUG	ave	8.92222	7.84444			9.1	9.6875
	std	2.00921	1.06369			1.94128	3.46181
	t-test	0.00418182				0.401426
sit to stand	ave	11.1111	13.1111		`	9.375	10.625
	std	2.20479	2.71314			1.92261	3.46152
	t-test	0.0124779				0.0949765
Gait	ave	1.21	1.21667			1.11	1.14062
	std	0.17621	0.141774			0.17021	0.196331
	t-test	0.883074				0.706445
weight	ave	78.4778	78.6778			77.7875	77.775
	std	13.4911	13.5774			22.983	22.1447
	t-test	0.605037				0.9777
BMI	ave	27.0444	26.6			28.175	28.2125
	std	4.00321	3.9387			7.29794	6.93682
	t-test	0.426024				0.809673
cohort summary table
	age	weight	BMI	WOMAC	LeQuesne	TUG	sit to stand	Gait speed
HIITS	56.9 (5.0)	76.8 (15.0)	27.6 (4.0)	32.9 ( 15.6)	8.8 (4.2)	8.9 (2.0)	11.1 (2.2)	1.21 (0.18)
CONT	63.1 (8.8)	79.3 (24.4)	28.9 (7.3)	34.8 (17.2)	9.6 (3.9)	9.1 (1.9)	9.4 (1.9)	1.11 (0.17)
All	61.2 (8.2)	78.2 (18.0)	27.7 (5.6)	25.5 (14.8)	9.2 (4.0)	9.0 (1.9)	10.3 (2.2)	1.16 (0.18)

## Sheet: Womac
	WOMAC		WOMAc HIIT					WOMAC cont									HIIT		MICT
02GrDi			before	after	difference	%difference		before	after	difference	%difference		Change score t-test		Baseline t-test		correl		correl
	22	03HuSt	22	8	14	63.6364	02GrDi	17	11	6	35.2941		0.829132		0.856994		0.679907		0.829958
04HuPa	17	07DaBr	54	53.5	0.5	0.925926	04HuPa	40	10.5	29.5	73.75
06SaGe	40	09ShDe	39	17	22	56.4103	06SaGe	46	31.5	14.5	31.5217
	46	13AnHa	22	21	1	4.54545	10JeHa	64	48	16	25
	54	17ViKe	29	25	4	13.7931	12SyFa	20	12	8	40
10JeHa	14.7	19ChRy	51	16	35	68.6275	14JiGo	26	18	8	30.7692
11GrMi	64	20BaFe	13	1	12	92.3077	18DeGr	27	14	13	48.1481
12SyFa	14	29RoWa	48	23	25	52.0833	27ViHo	38	38	34	89.4737
	20	30HeWi	47	26	21	44.6809
14JiGo
18DeGr
								34.75	22.875	16.125	46.7446
24AkJo								15.5357	14.3894	10.319	22.9702
25MiLo	average		36.1111	21.1667	14.9444	44.1123
26chBe	std dev		14.9703	14.6245	11.8439	31.3646
								35.4706
								14.7696
average	35.4706
	14.7696
		22	2
		54	8				pvalue	0.0065486
		14.7	2																				0.168525
	PVALUE	0.00534714																									0.269462

## Sheet: AGE
HIIT	MICT		HIIT	MICT		HIIT	MICT				AGE		height		diagnosis
age			height			diagnosis durtaion					Baseline t-test		Baseline t-test		Baseline t-test
72	63		178	157.9		2.8	2				0.0904745		0.15928		0.912177
52	67		178.8	174		14	5
52	58		157.5	173		0.5	0.5
53	62		168.5	165.3		0.7	3.5
55	64		169	161.2		13.5	9
63	65		168.3	161.7		0.2	5
61	63		168.1	160		1	9
63	87		171	171		4
61			171.096
59.1111	66.125		170.033	165.513		4.5875	4.85714
6.69784	8.82266		6.22125	6.32148		5.80035	3.24954
62.4118			167.906			4.71333
8.33711			6.49954			4.62244

## Sheet: Tug
	TUG HIITS					TUG cont									HIIT		MICT
	before	after	difference	%difference		before	after	difference	%difference				Baseline t-test		correl		correl
03HuSt	10	8	2	20	02GrDi	6.7	6.5	0.2	2.98507		0.0430276		0.855432		0.937676		0.914495
07DaBr	9.3	9	0.3	3.22581	04HuPa	9.5	9.3	0.2	2.10526
09ShDe	9.5	8.3	1.2	12.6316	06SaGe	9.4	8.8	0.6	6.38298
13AnHa	7	6.9	0.1	1.42857	10JeHa	10.1	12	-1.9	-18.8119
17ViKe	11.4	10	1.4	12.2807	12SyFa	7.9	9.8	-1.9	-24.0506
19ChRy	11.8	9.2	2.6	22.0339	14JiGo	8.7	6.9	1.8	20.6897
20BaFe	8.4	7.5	0.9	10.7143	18DeGr	7.5	7.2	0.3	4
29RoWa	6.6	6	0.6	9.09091	27viHo	13	17	-4	-30.7692
30HeWi	6.3	5.7	0.6	9.52381
	8.92222	7.84444				9.1	9.6875	-0.5875	-4.6836
	2.00921	1.06369	1.07778	11.2144		1.94128	3.46181	1.86044	17.735
			0.889623	7.69357
average	9.00588
	1.91718
	0.00418182					0.401426
								6.5
								9.31
								8.75
								12
								9.8

## Sheet: Leq
	LEQ	HIIT				LEQ	CONT								HIIT		MICT
	before	after	difference	%difference		before	after	difference	%difference				Baseline t-test		correl		correl
03HuSt	5.5	5.5	0	0	02GrDi	5.5	3.5	2	36.3636		0.706926		0.695832		0.651277		0.929503
07DaBr	16.5	14.5	2	12.1212	04HuPa	6.5	4.5	2	30.7692
09ShDe	4.5	5	-0.5	-11.1111	06SaGe	12	9	3	25
13AnHa	7	7	0	0	10JeHa	17.5	17.5	0	0
17ViKe	8	6	2	25	12SyFa	9	5	4	44.4444
19ChRy	14	3.5	10.5	75	14JiGo	7.5	7.5	0	0
20BaFe	4	1	3	75	18DeGr	7.5	8	-0.5	-6.66667
29RoWa	10.5	8	2.5	23.8095	27viHo	11.5	12	12	104.348
30HeWi	9.5	10	-0.5	-5.26316
	8.83333	6.72222				9.625	8.375	2.8125	29.2823
	4.272	3.88998	2.11111	21.6174		3.91654	4.59619	4.035	35.7424
			3.79065	35.8695
						9.03333
						4.22774
	pvalue	0.101677
					pvalue	0.0805651
average	9.20588
	4.00023

## Sheet: sit to stand
	sit to standHIIT					sit to standHIIT	CONT								HIIT		MICT
	before	after	difference	%difference		before	after	difference	%difference				Baseline t-test		correl		correl
03HuSt	11	11	0	0	02GrDi	9	9	0	0		0.417458		0.103377		0.729051		0.925705
07DaBr	13	13	0	0	04HuPa	10	10	0	0
09ShDe	9	12	-3	-33.3333	06SaGe	8	8	0	0
13AnHa	14	14	0	0	10JeHa	7	6	1	14.2857
17ViKe	9	10	-1	-11.1111	12SyFa	8	11	-3	-37.5
19ChRy	8	10	-2	-25	14JiGo	9	10	-1	-11.1111
20BaFe	11	14	-3	-27.2727	18DeGr	11	14	-3	-27.2727
29RoWa	14	18	-4	-28.5714	27ViHo	13	17	-4	-30.7692
30HeWi	11	16	-5	-45.4545
						9.375	10.625	-1.25	-11.5459
Ave	11.1111	13.1111	-2	-18.9715		1.92261	3.46152	1.83225	18.3532
std	2.20479	2.71314	1.87083	16.7577
					ttest	0.0949765
ttest	0.0124779
average	10.2941
	2.20127

## Sheet: Gaitmat
	gait	HIIT				gait	CONT								HIIT		MICT
	before	after	difference	%difference		before	after	difference	%difference				Baseline t-test		correl		correl
03HuSt	1.09	1.38	0.29	21.0145	02GrDi	1.17	1.5	-0.33	-28.2051		0.684994		0.253005		0.676485		0.281076
07DaBr	0.9	0.95	0.05	5.26316	04HuPa	1.1	0.83	0.27	24.5455
09ShDe	1.2	1.26	0.06	4.7619	06SaGe	1.15	1.15	0	0
13AnHa	1.41	1.31	-0.1	-7.63359	10JeHa	1.09	0.98	0.11	10.0917
17ViKe	1.23	1.15	-0.08	-6.95652	12SyFa	1.12	1.11	0.01	0.892857
19ChRy	1.02	1.09	0.07	6.42202	14JiGo	1.16	1.16	0	0
20BaFe	1.36	1.36	0	0	18DeGr	1.35	1.27	0.08	5.92593
29RoWa	1.39	1.3	-0.09	-6.92308	27ViHo	0.74	1.125	-0.385	-52.027
30HeWi	1.29	1.15	-0.14	-12.1739
						1.11	1.14062	-0.030625	-4.84702
Ave	1.21	1.21667	0.00666667	0.419386		0.17021	0.196331	0.220753	24.0673
std	0.17621	0.141774	0.131719	10.213
					ttest	0.706445
ttest	0.883074
average	1.16294
	0.175633

## Sheet: weight
	weight	HIIT				weight	CONT								HIIT		MICT
	before	after	difference	%difference		before	after	difference	%difference				Baseline t-test		correl		correl
03HuSt	87.6	89.9	-2.3	-2.62557	02GrDi	73.4	73.8	-0.4	-0.544959		0.714489		0.942081		0.996629		0.999227
07DaBr	103.8	102.5	1.3	1.25241	04HuPa	83.2	83.7	-0.5	-0.600962
09ShDe	73.8	73.1	0.7	0.948509	06SaGe	129.9	127.4	2.5	1.92456
13AnHa	79.6	80	-0.4	-0.502513	10JeHa	73.5	74.1	-0.6	-0.816327
17ViKe	66.9	67.7	-0.8	-1.19581	12SyFa	55.9	57.1	-1.2	-2.14669
19ChRy	63.9	64.2	-0.3	-0.469484	14JiGo	59.8	58.6	1.2	2.00669
20BaFe	62.1	61	1.1	1.77134	18DeGr	79.3	80	-0.7	-0.882724
29RoWa	80.7	81	-0.3	-0.371747	27ViHo	67.3	67.5	-0.2	-0.297177
30HeWi	87.9	88.7	-0.8	-0.910125
						77.7875	77.775	0.0125	-0.169699
Ave	78.4778	78.6778	-0.2	-0.233667		22.983	22.1447	1.22058	1.42932
std	13.4911	13.5774	1.11467	1.3637
					ttest	0.9777		78.1529
ttest	0.605037							17.9507
average	78.1529
	17.9507

## Sheet: Fat body
	Fat	HIIT				fat	CONT								HIIT		MICT
	before	after	difference	%difference		before	after	difference	%difference				Baseline t-test		correl		correl
03HuSt	19.8	23	-3.2	-16.1616	02GrDi	39.9	41	-1.1	-2.75689		0.966788		0.186818		0.945989		0.993504
07DaBr	28.5	27.1	1.4	4.91228	04HuPa	38.7	41	-2.3	-5.94315
09ShDe	37	36.5	0.5	1.35135	06SaGe	51	51.2	-0.2	-0.392157
13AnHa	29.2	30.4	-1.2	-4.10959	10JeHa	38	37.9	0.1	0.263158
17ViKe	29	28.1	0.9	3.10345	12SyFa	32.2	31.1	1.1	3.41615
19ChRy	33.8	33	0.8	2.36686	14JiGo	28.1	29.5	-1.4	-4.98221
20BaFe	27.7	27.2	0.5	1.80505	18DeGr	39.3	39.6	-0.3	-0.763359
29RoWa	36.3	37.3	-1	-2.75482	27ViHo	21	21.1	-0.1	-0.47619
30HeWi	36.4	40.1	-3.7	-10.1648
						36.025	36.55	-0.525	-1.45433
Ave	30.8556	31.4111	-0.555556	-2.18354		8.97803	9.1297	1.043	3.01249
std	5.59824	5.67504	1.85412	6.98693
					ttest	0.0987715
ttest	0.197479
average	33.2882
	7.61634

## Sheet: muscle
	muscle	HIIT				muscle	CONT								HIIT		MICT
	before	after	difference	%difference		before	after	difference	%difference				Baseline t-test		correl		correl
03HuSt	66.8	65.8	1	1.49701	02GrDi	41.9	41.3	0.6	1.43198		0.861351		0.217798		0.994491		0.990502
07DaBr	70.5	71	-0.5	-0.70922	04HuPa	48.8	46.9	1.9	3.89344
09ShDe	44.1	44	0.1	0.226757	06SaGe	60.4	59	1.4	2.31788
13AnHa	53.6	52.9	0.7	1.30597	10JeHa	43.3	43.7	-0.4	-0.923788
17ViKe	45.1	46.2	-1.1	-2.43902	12SyFa	36	37.2	-1.2	-3.33333
19ChRy	40.1	40.8	-0.7	-1.74564	14JiGo	40.8	39.2	1.6	3.92157
20BaFe	42.6	42.1	0.5	1.17371	18DeGr	45.7	45.8	-0.1	-0.218818
29RoWa	48.8	48.2	0.6	1.22951	27ViHo	50.5	50.6	-0.1	-0.19802
30HeWi	53.1	50.4	2.7	5.08475
						45.925	45.4625	0.4625	0.861364
Ave	51.6333	51.2667	0.366667	0.624868		7.43193	7.18325	1.09536	2.50932
std	10.6892	10.5208	1.12583	2.20019
					ttest	0.135635
ttest	0.178579
average	48.9471
	9.48262

[truncated: 4 more sheets: bmi, Sheet2, Sheet1, adherence and adverse]
